# Supplementary material for: Mitophagy Promotes Sorafenib Resistance through Hypoxia-Inducible ATAD3A Dependent Axis
Source: Research Square preprint supplement (doi:10.21203/rs.3.rs-48449/v2), 2020-11-11
Supplement: Supplementary file 1 [file 31ec65de30af7b727aa7d140.docx]

**Supplementary table 1. Target sequences and ORF expression clone for PINK1 and ATAD3A.**

| Gene  (Accession no.) | | Primer sequence (5’→3’) |
| --- | --- | --- |
| PINK1  (NM_65018)  ATAD3A  (NM_001170535 ) | Target sequence | 1- CCAGGCTGGGCCGCAGGACCG  2- CCCCTCACCCCAACATCATCC  3- CGGACGCTGTTCCTCGTTATG |
| Target sequence | CCGGCCTGCACATTTAGGATATGCTCTC  GAGAGCATATCCTAAATGTGCAGGTTTTTTG |
| ATAD3A  (NM_001170535 ) | ORF clone | Forward: 5'CTCCATAGAAGACACCGAC-3'  Reverse: 5-'CATATAGACAAACGCACAC3' |
